# Supplementary material
Source: Springer Nature journal article supplement (https://www.springermedizin.de/resource/supplementary/12887_2005_84_MOESM1_ESM.pdf/9477226)
Supplement: MOESM1 [file 9477226]

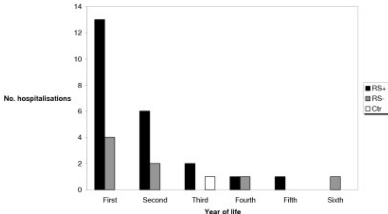

RS+ = Children hospitalised for acute RSV bronchiolitis during infancy

RS- = Children hospitalised for acute non-RSV bronchiolitis during infancy

Ctr = Children not hospitalised for acute viral bronchiolitis during infancy
